# Supplementary figures and images for: Proton-controlled photoisomerization: rhenium(i) tricarbonyl bipyridine linked to amine or azacrown ether groups by a styryl pyridine bridging ligand
Source: Royal Society of Chemistry journal article supplement (doi:10.1039/b005889k), 2000-01-01

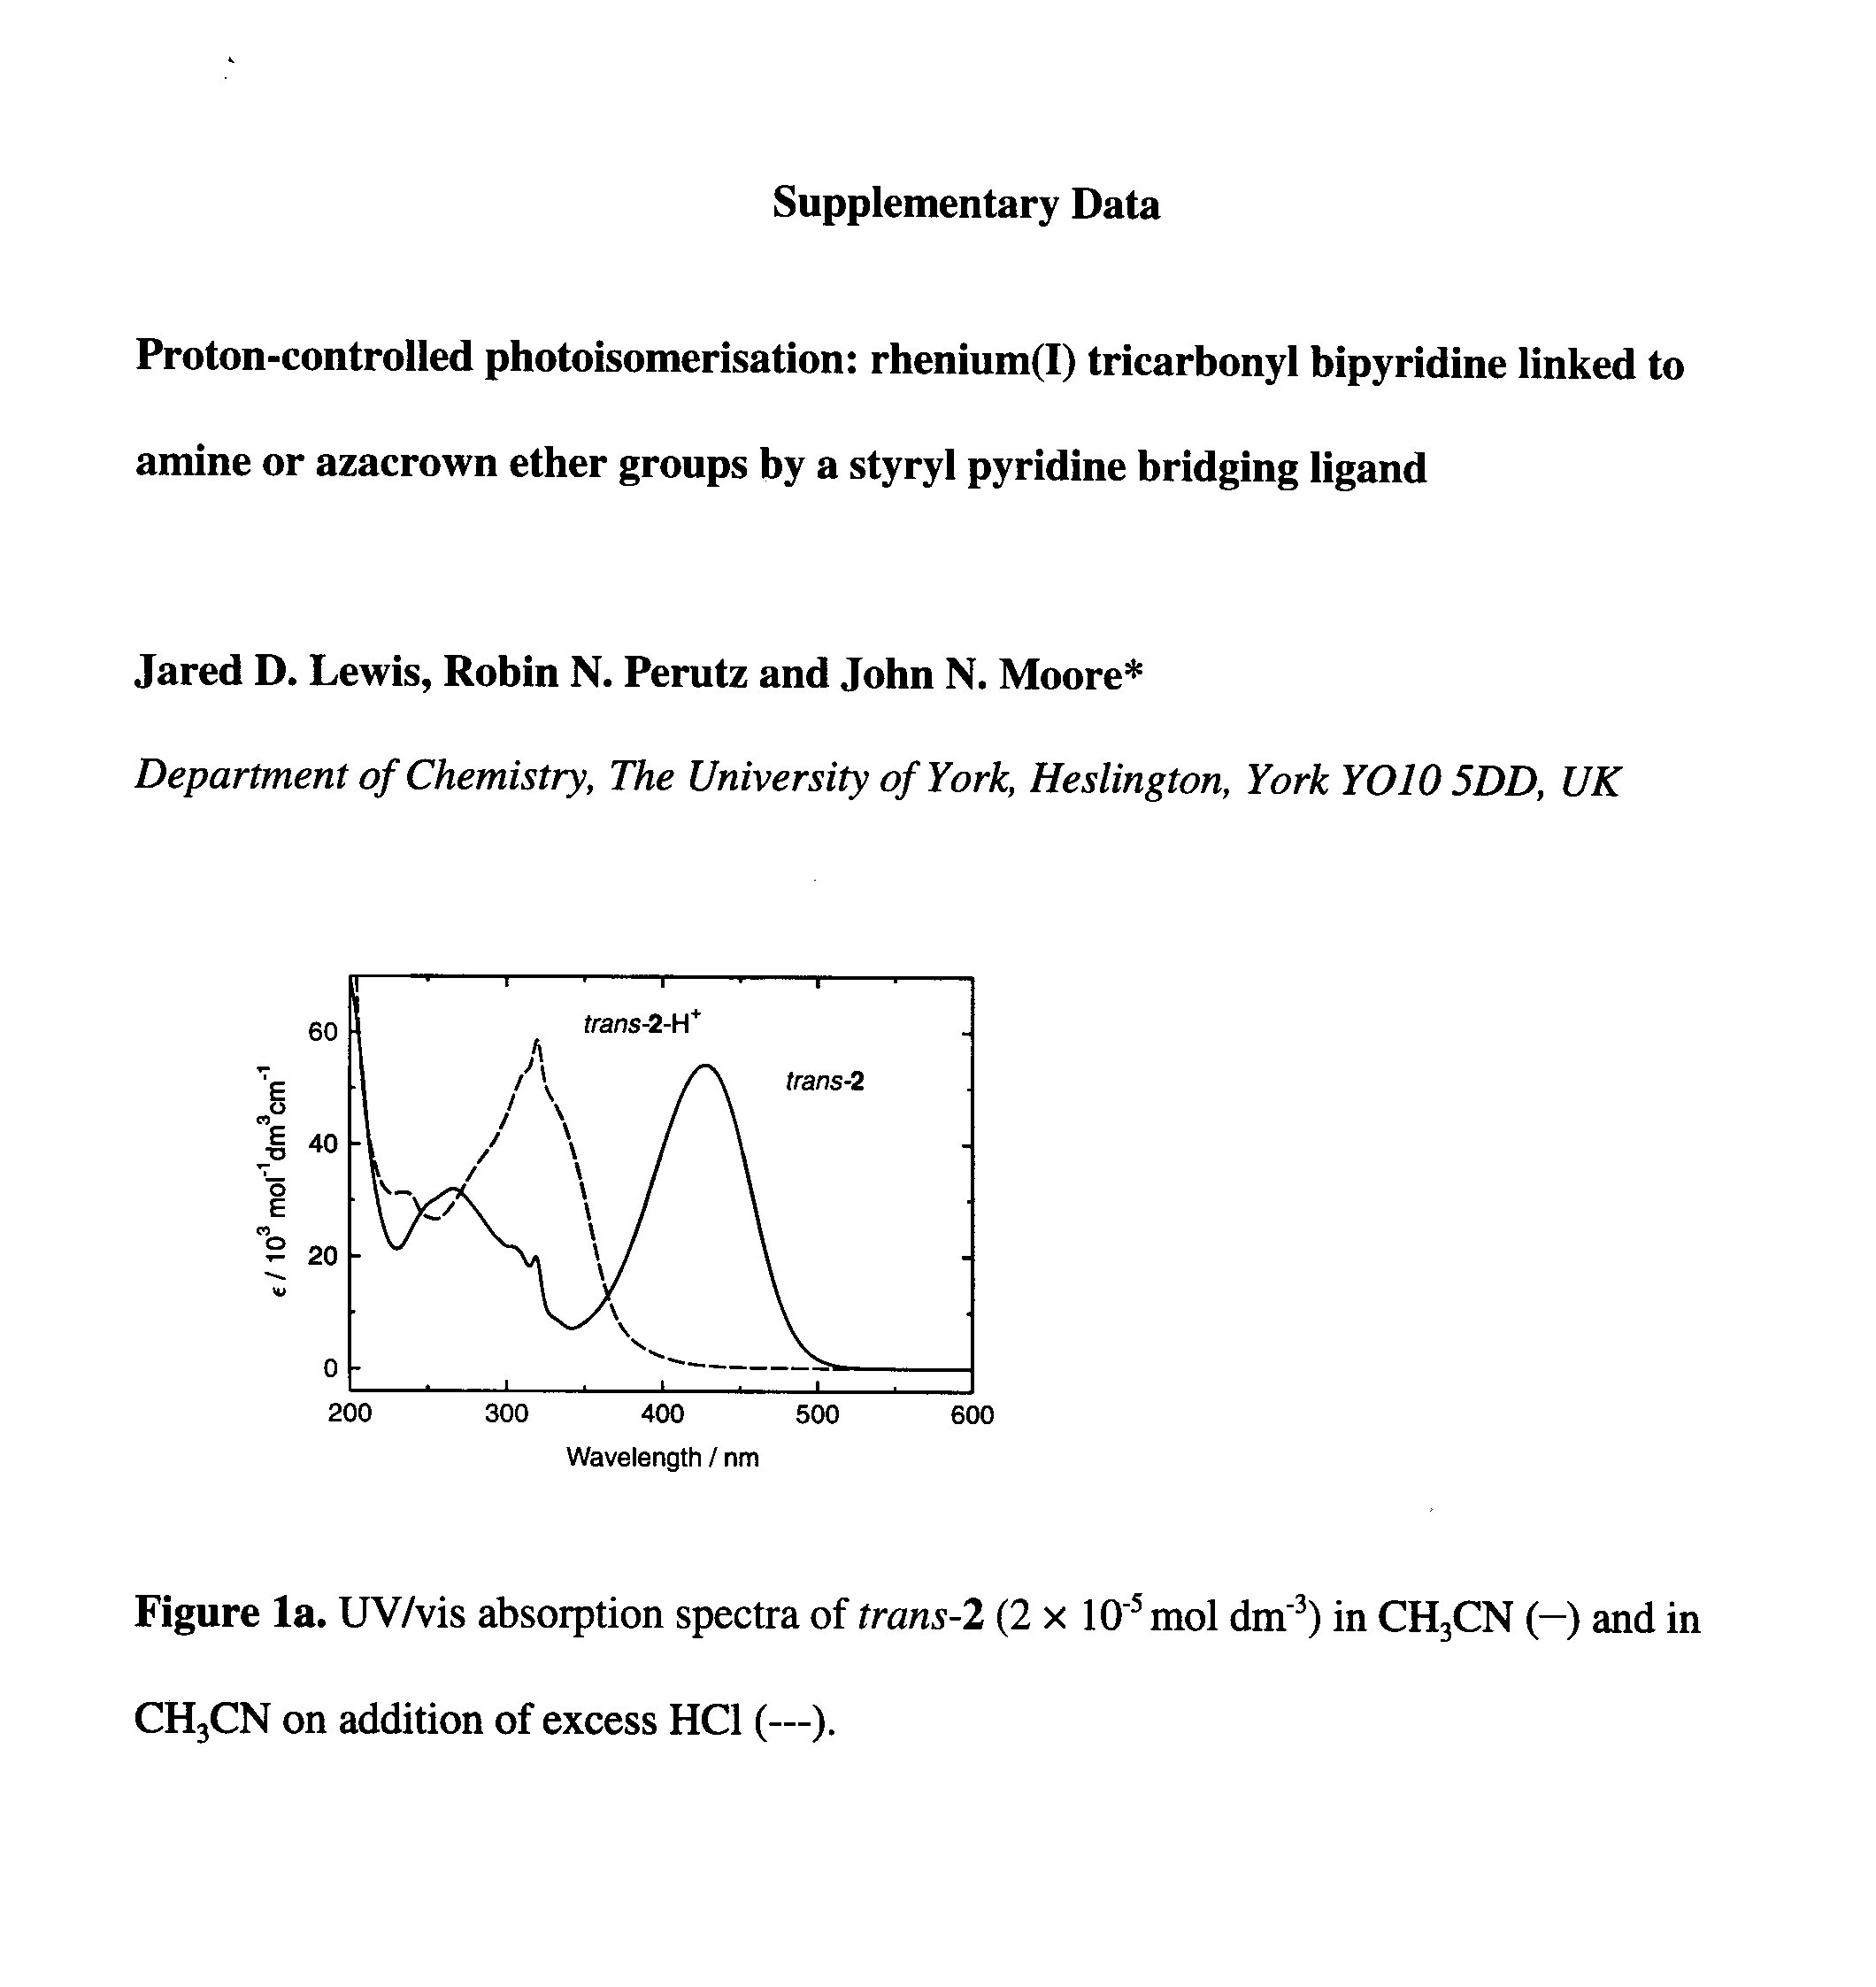


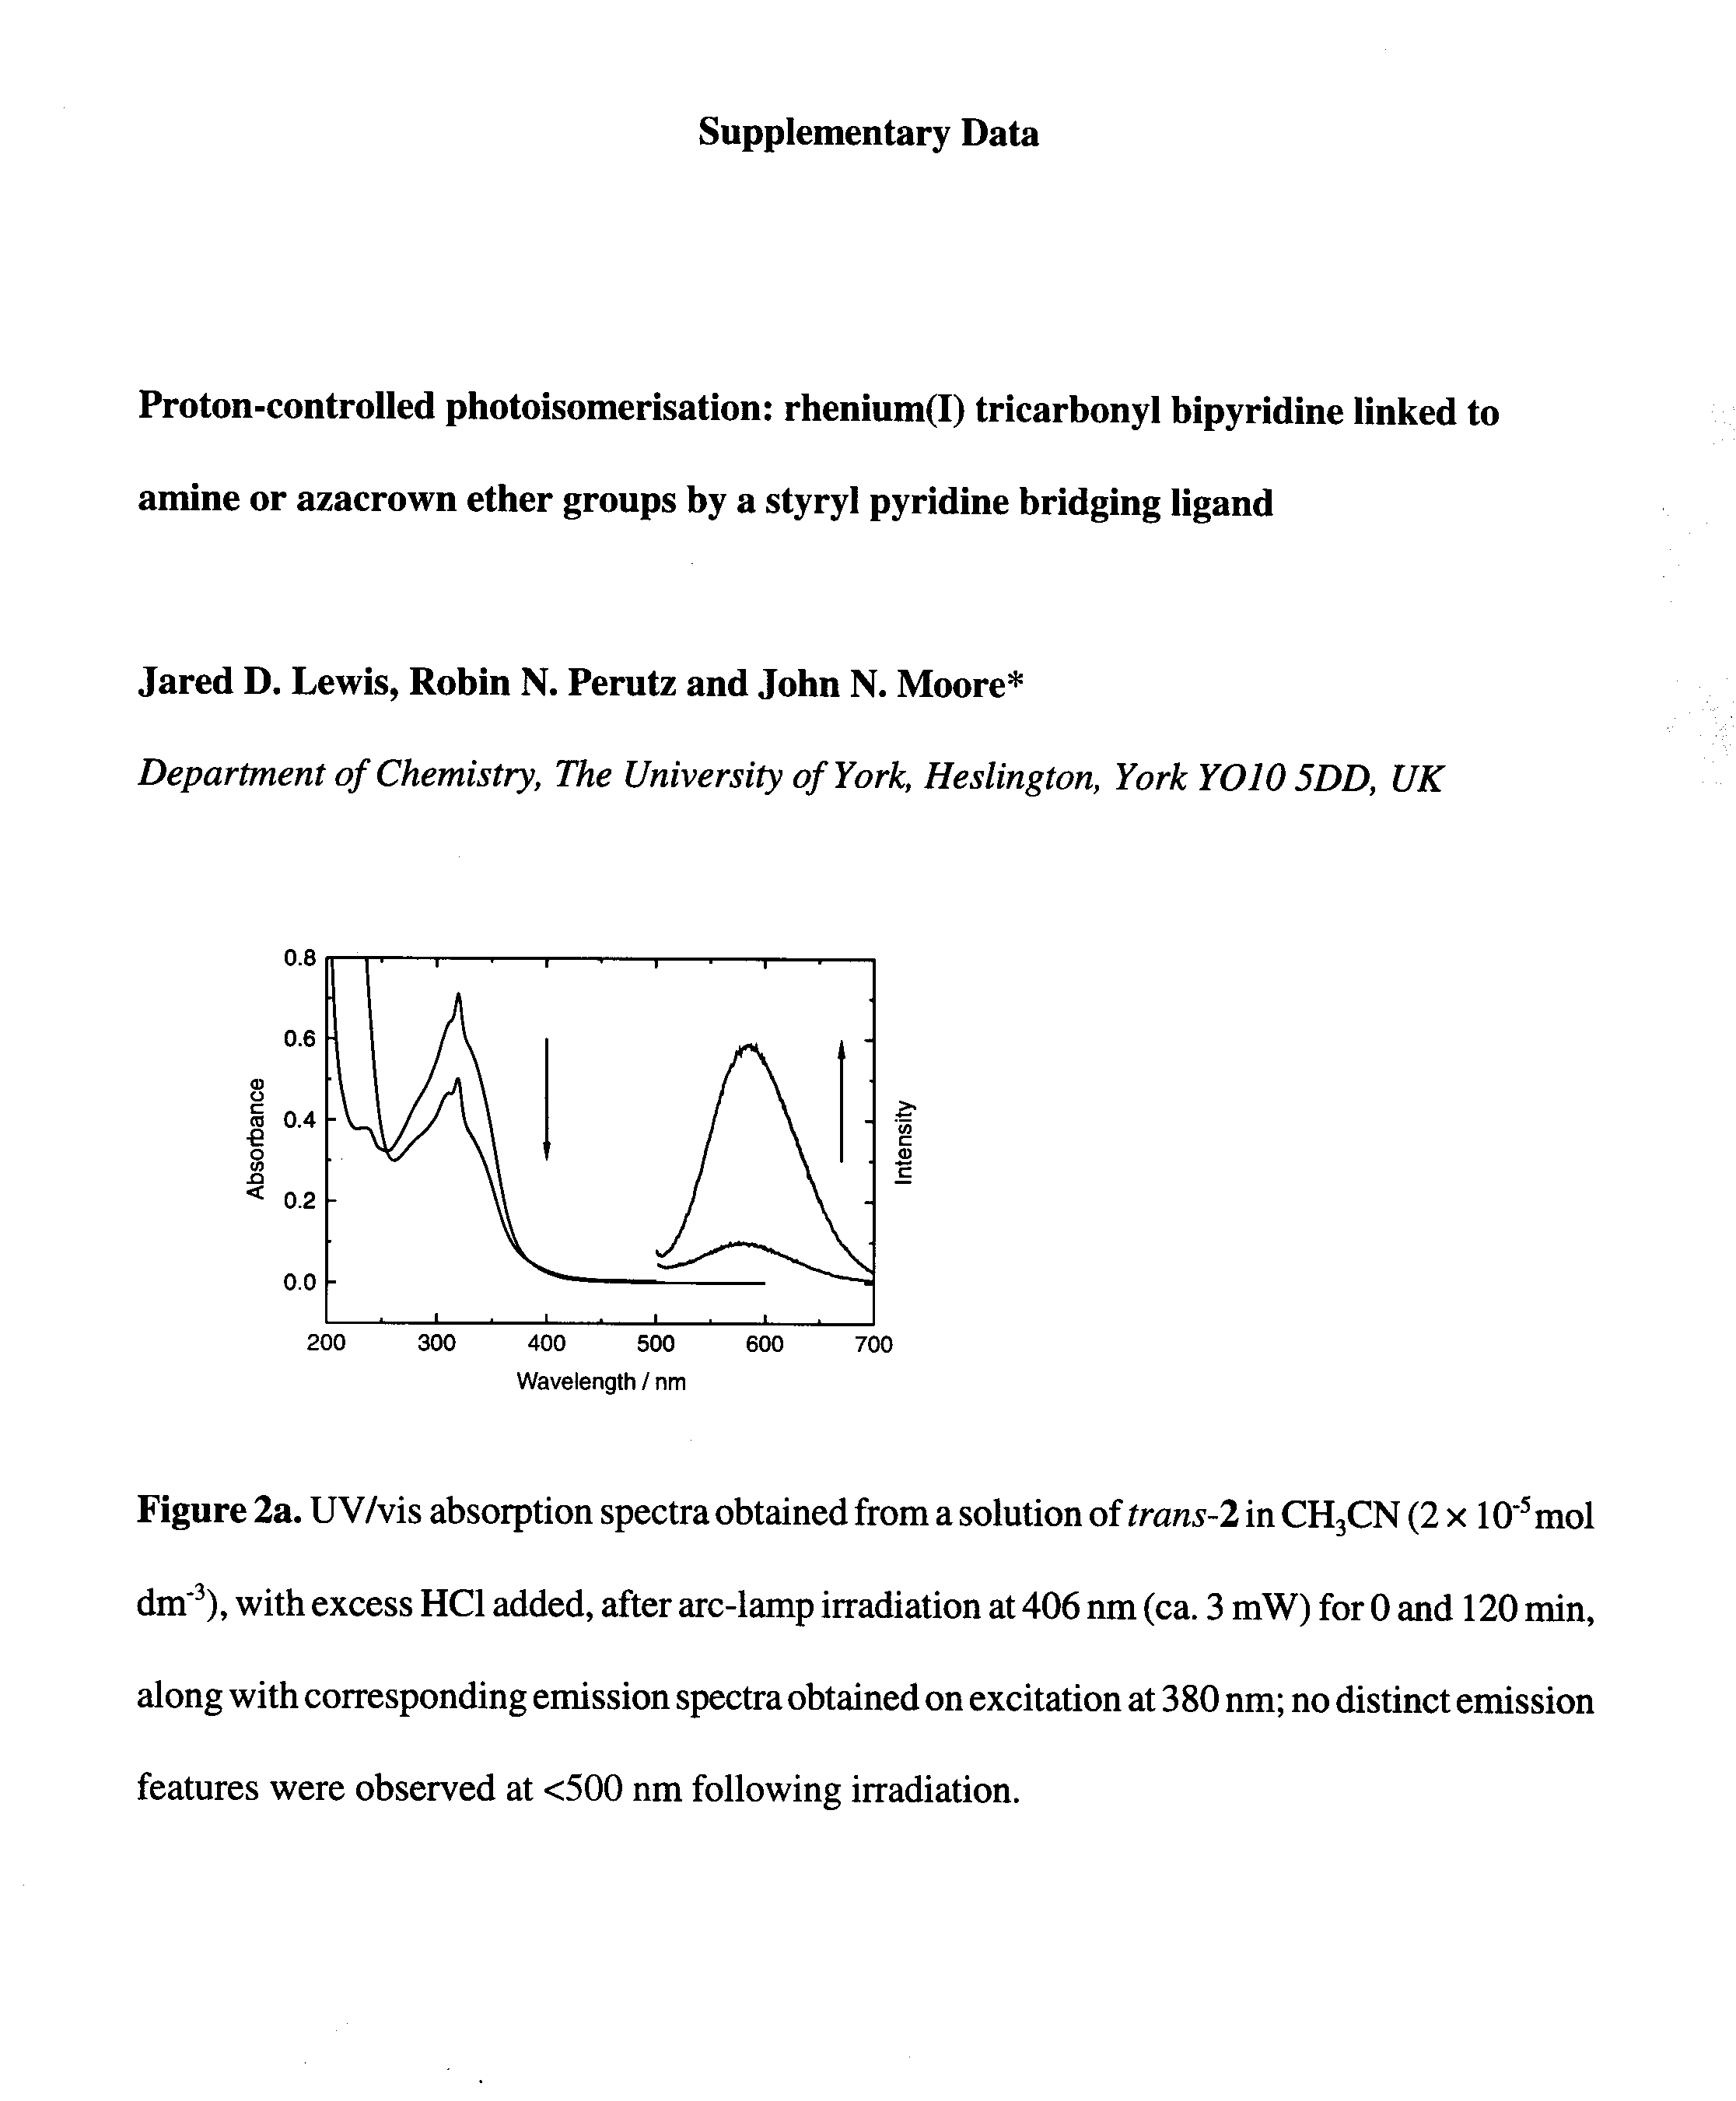

Supplement: b005889k.doc [file b005889k.doc]
